# Supplementary material
Source: publisher site journal article supplement (https://www.dovepress.com/article/472468)
Supplement: Supplementary file 1 [file get_supplementary_file.php]

**Supplementary Table 1. Physician characteristics**

| **Sex, n (%)**  N | 76 |
| --- | --- |
| Male | 53 (69.7) |
| Female | 23 (30.3) |
| **Year qualified as a specialist, n (%)**  N | 76 |
| 1981-1993 | 23 (30.3) |
| 1994-2003 | 20 (26.3) |
| 2004-2014 | 23 (30.3) |
| After 2014 | 10 (13.2) |

**Supplementary Table 2. Patient co-management**

|  | **Total** | **Current managing physician** | |
| --- | --- | --- | --- |
|  | (N=380) | Endocrinologist  (n=90) | Gastroenterologist a  (n=290) |
| **Patients primarily managed by a gastroenterologista**  N  Patient managed with another physician, n (%) | 240  152 (63) | 9  9 (100) | 231  143 (62) |
| **Patients that are managed by a gastroenterologist and another physician**  N  *Other managing physician, n (%)*  Endocrinologist  Gastroenterologist with subspecialty in hepatology  Gastroenterologist  PCP  Nutritionist/dietitian  Cardiologist  Infectious disease specialist  Radiologist  Other HCP | 152  59 (39)  43 (28)  37 (24)  39 (26)  26 (17)  15 (10)  2 (1)  4 (3)  20 (13) | 9  7 (78)  4 (44)  4 (44)  2 (22)  1 (11)  0 (0)  0 (0)  0 (0)  3 (33) | 143  52 (36)  39 (27)  33 (23)  37 (26)  25 (17)  15 (10)  2 (1)  4 (3)  17 (12) |
| **Patients primarily managed by an endocrinologist**  N  Patient managed with another physician, n (%) | 124  106 (85) | 75  57 (76) | 49  49 (100) |
| **Patients that are managed by an endocrinologist and another physician**  N  *Other managing physician, n (%)*  PCP  Gastroenterologist  Endocrinologist  Gastroenterologist with subspecialty in hepatology  Nutritionist/dietitian  Cardiologist  Radiologist  Infectious disease specialist  Other HCP | 106  58 (55)  54 (51)  45 (42)  31 (29)  23 (22)  5 (5)  1 (1)  1 (1)  10 (9) | 57  21 (37)  20 (35)  2 (4)  21 (37)  5 (9)  2 (4)  1 (2)  1 (2)  6 (11) | 49  37 (76)  34 (69)  43 (88)  10 (20)  18 (37)  3 (6)  0 (0)  0 (0)  4 (8) |

HCP = healthcare provider; PCP = primary care physician.

aGastroenterologist category also includes gastroenterologists or internists with a subspecialty in hepatology.

**Supplementary Table 3. Pharmacological treatment by T2DM or obesity status**

|  | **Total** | **Current managing physician** | |
| --- | --- | --- | --- |
|  | (N=380) | Endocrinologist  (n=90) | Gastroenterologist a  (n=290) |
| **All patients with T2DM, n** | **235** | **70** | **165** |
| Currently receiving ≥1 treatment to manage NASH b, n (%) | 154 (66) | 52 (74) | 102 (62) |
| **Treatments currently received for NASH as recommended by Italian guidelines c, n (%)**  n (%)  Vitamin E  Pioglitazone  GLP-1 | .  77 (33)  27 (11)  15 (6)  46 (20) | 36 (51)  8 (11)  8 (11)  24 (34) | 41 (25)  19 (12)  7 (4)  22 (13) |
| Treatments currently received for associated conditions in attempt to control NASH d, n (%)  n (%)  ***Anti-diabetic treatment e***  n (%)  Metformin  DPP-4  SGLT-2  ***Weight-loss treatment f***  n (%)  Current prescription anti-obesity medication  Current non-prescription weight-loss drug  Previous weight-loss surgery | 132 (56)  121 (51)  115 (49)  11 (5)  12 (5)  28 (12)  13 (6)  19 (8)  3 (1) | 45 (64)  38 (54)  36 (51)  4 (6)  4 (6)  14 (20)  8 (11)  7 (10)  2 (3) | 87 (53)  83 (50)  79 (48)  7 (4)  8 (5)  14 (8)  5 (3)  12 (7)  1 (1) |
| **All patients without T2DM, n**  Currently receiving ≥1 treatment to manage NASH b  n (%) | **145**  65 (45) | **20**  9 (45) | **125**  56 (45) |
| **Treatments currently received for NASH as recommended by Italian guidelines c, n (%)**  n (%)  ***Anti-diabetic treatment e***  n (%)  Metformin  DPP-4  SGLT-2  ***Weight-loss treatment f***  n (%)  Current prescription anti-obesity medication  Current non-prescription weight-loss drug  Previous weight-loss surgery | 47 (32)  27 (19)  26 (18)  1 (1)  0 (0)  26 (18)  10 (7)  19 (13)  1 (1) | 7 (35)  4 (20)  4 (20)  0 (0)  0 (0)  6 (30)  3 (15)  3 (15)  0 (0) | 40 (32)  23 (18)  22 (18)  1 (1)  0 (0)  20 (16)  7 (6)  16 (13)  1 (1) |
| **All patients with obesity (BMI ≥30 kg/m2), n**  Currently receiving ≥1 treatment to manage NASH b  n (%) | **308**  192 (62) | **81**  56 (69) | **227**  136 (60) |
| **Treatments currently received for NASH as recommended by Italian guidelines c, n (%)**  n (%)  Vitamin E  Pioglitazone  GLP-1 | 91 (30)  38 (12)  19 (6)  47 (15) | 37 (46)  10 (12)  9 (11)  23 (28) | 54 (24)  28 (12)  10 (4)  24 (11) |
| **Treatments currently received for associated conditions in attempt to control NASH d, n (%)**  n (%)  ***Anti-diabetic treatment e***  n (%)  Metformin  DPP-4  SGLT-2  ***Weight-loss treatment f***  n (%)  Current prescription anti-obesity medication  Current non-prescription weight-loss drug  Previous weight-loss surgery | 162 (53)  133 (43)  128 (42)  10 (3)  12 (4)  50 (16)  23 (7)  34 (11)  4 (1) | 47 (58)  37 (46)  35 (43)  4 (5)  4 (5)  18 (22)  11 (14)  8 (10)  2 (2) | 115 (51)  96 (42)  93 (41)  6 (3)  8 (4)  32 (14)  12 (5)  26 (11)  2 (1) |
| **All patients without obesity (BMI <30 kg/m2), n**  n (%)  **Treatments currently received for NASH as recommended by Italian guidelines c, n (%)**  n (%)  Vitamin E  Pioglitazone  GLP-1 | 72  27 (38)  15 (21)  11 (15)  1 (1)  3 (4) | 9  5 (56)  3 (33)  0 (0)  1 (11)  2 (22) | 63  22 (35)  12 (19)  11 (17)  0 (0)  1 (2) |
| **Treatments currently received for associated conditions in attempt to control NASH d, n (%)**  n (%)  ***Anti-diabetic treatment e***  **n (%)**  Metformin  DPP-4  SGLT-2  ***Weight-loss treatment f***  n (%)  Current prescription anti-obesity medication  Current non-prescription weight-loss drug  Previous weight-loss surgery | 17 (24)  15 (21)  13 (18)  2 (3)  0 (0)  4 (6)  0 (0)  4 (6)  0 (0) | 5 (56)  5 (56)  5 (56)  0 (0)  0 (0)  2 (22)  0 (0)  2 (22)  0 (0) | 12 (19)  10 (16)  8 (13)  2 (3)  0 (0)  2 (3)  0 (0)  2 (3)  0 (0) |

BMI = body mass index; DPP-4 = dipeptidyl peptidase 4 inhibitor; GLP-1 = Glucagon-like peptide-1 receptor agonist; NASH = non-alcoholic steatohepatitis; SD = standard deviation; SGLT-2 = sodium-glucose co-transporter-2 inhibitor; T2DM = type 2 diabetes mellitus.

a Gastroenterologist category also includes gastroenterologists or internists with a subspecialty in hepatology.

b Defined as having at least one of the following: currently on treatment with a guideline-recommended treatment (vitamin E, pioglitazone, or GLP-1), currently on anti-diabetic treatment (metformin, DPP-4, or SGLT-2), or currently on weight-loss treatment (had weight-loss surgery, currently on prescription weight-loss drug, or currently on non-prescription (over the counter) weight-loss drug).

c Defined as currently on treatment with a guideline-recommended treatment (vitamin E, pioglitazone, or GLP-1). Use of GLP-1 is recommended in the context of T2DM. Refer to Eat Weight Disord 2022;27:1603-19.

d Defined as having at least one of the following: currently on an anti-diabetic drug (metformin, DPP-4, or SGLT-2), or currently on weight-loss treatment (had weight-loss surgery, currently on a prescription weight-loss drug, or currently on non-prescription (over the counter) weight-loss drug).

e Defined as currently on anti-diabetic treatment (metformin, DPP-4, or SGLT-2). Note excludes GLP-1 as included as guideline treatment for NASH.

f Defined as having at least one of the following: had weight-loss surgery, currently on prescription weight-loss drug, or currently on non-prescription (over the counter) weight-loss drug.

**Supplementary Table 4. Healthcare resource use**

|  |  | **Current managing physician** | | **Physician-stated current fibrosis stage** | |
| --- | --- | --- | --- | --- | --- |
|  | Total  (N=231a) | Endocrinologist  (n=47) | Gastroenterologistb  (n=184) | No/non-advanced fibrosis  (n=142) | Advanced fibrosis  (n=29) |
| **Patient hospitalized in the last 12 months**  Yes, n (%) | 35 (15) | 5 (11) | 30 (16) | 25 (18) | 8 (28) |
| **Number of hospitalizations in the last 12 months ***  Mean ± SD | 1.4 ± 0.70 | 1.2 ± 0.45 | 1.5 ± 0.73 | 1.4 ± 0.71 | 1.4 ± 0.74 |
| **Hospitalizations in the last 12 months due to NASH**  Yes, n (%) | 13 (37) | 1 (20) | 12 (40) | 10 (40) | 3 (38) |
| **Hospitalizations in the last 12 months due to NASH-associated condition**  Yes, n (%) | 18 (51) | 4 (80) | 14 (47) | 12 (48) | 5 (63) |

NASH = nonalcoholic steatohepatitis; SD = standard deviation.

a Patients with “don’t know” were excluded.

b Gastroenterologist category also includes gastroenterologists or internists with a subspecialty in hepatology

* Including surgery the patient had
